# Supplementary material
Source: Springer Nature journal article supplement (https://www.springermedizin.de/resource/supplementary/13075_2012_3624_MOESM6_ESM.pdf/9694912)

a. Proposals of threshold according to different techniques and different times of evaluation <sup>+</sup>

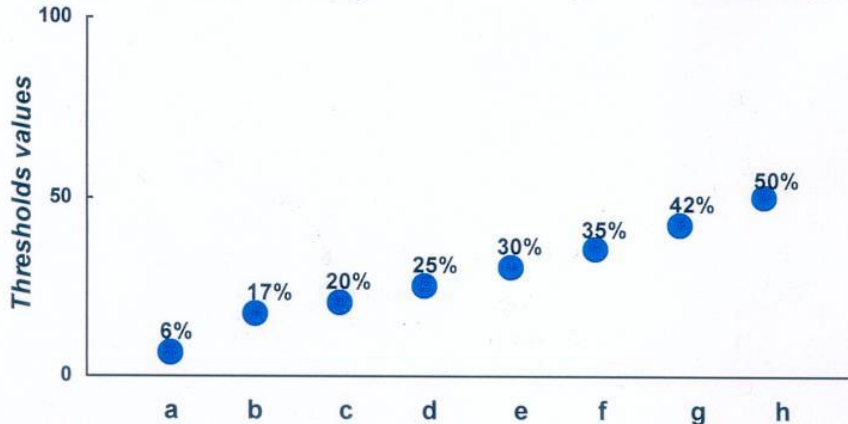

b. Evaluation of external validity (*versus* DAS28-ESR) of different proposed thresholds <sup>+</sup>

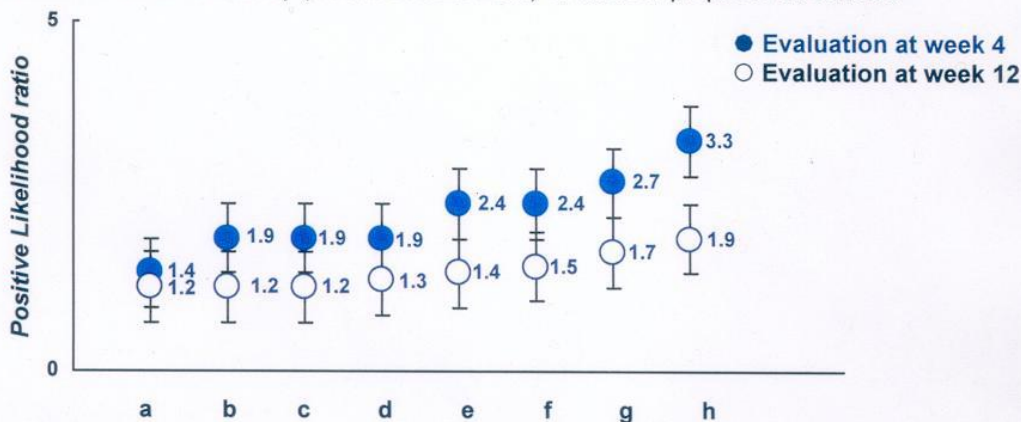

c. Evaluation of external validity (*versus* patient's global assessment) of different proposed thresholds

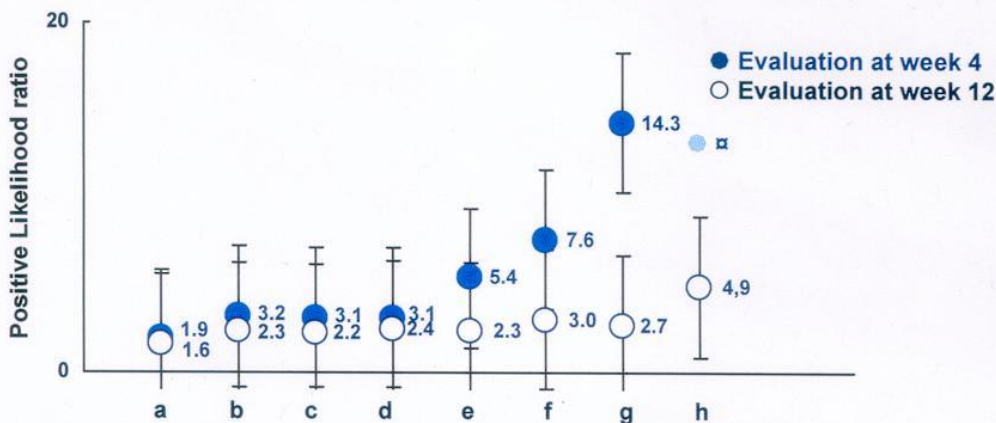

Supplement: MOESM6 [file 9694912]
